# Supplementary material for: Antiviral Immunoglobulins of Chicken Egg Yolk for Potential Prevention of SARS-CoV-2 Infection
Source: MDPI journal article supplement (doi:10.3390/v14102121), 2022-09-26
Supplement: s1 [file s1]



# **EVALUATION OF ANTI-SCoV-2 IgY EFFICACY IN SARS-COV-2 INFECTED HAMSTERS**

**Partial final Report: Study N° 210183**

26 September 2022

**HEADQUARTERS**

18-20 rue Jean Mazon - BP27627  
FR-21076 Dijon Cedex  
Tel. +33 (0) 380 788 260

**SECONDARY ESTABLISHMENT.**

25-27 avenue de Québec  
FR 91140 Villebon-sur-Yvette Cedex  
Tel. +33 (0) 169 296 000

**ONCODESIGN Inc.**

11-2901 Rue Rachel Est  
Montréal, QC H1W 4A4 Canada  
Tel. +(1) 514 527 7234

**[oncodesign.com](https://oncodesign.com)**

[contact@oncodesign.com](mailto:contact@oncodesign.com)

## Study Management

### Testing Company: Oncodesign® Biotechnology

Headquarters  
20 rue Jean Mazen  
BP 27627  
21076 Dijon Cedex  
France  
☎: +33 (0)3 80 78 82 60  
✉: [contact@oncodesign.com](mailto:contact@oncodesign.com)

**Study Director: Nicolas Legrand, Ph.D., D.V.M.**

\_\_\_\_\_  
**Signature**

\_\_\_\_\_  
**Date (dd/mm/yy)**

**Associate Study Director: Guillaume Fichet, Ph.D.**

**Report Writer: Pauline Bornert, PhD, DVM**

### Sponsor: Norimmun

Norimun AS  
Postboks 469, Sentrum  
0105, Oslo  
NORWAY  
☎: +47 958 50073  
✉: [Lasse@NoriChick.onmicrosoft.com](mailto:Lasse@NoriChick.onmicrosoft.com)

**Sponsor representative: Lasse EVENSEN (Project Manager)**

\_\_\_\_\_  
**Signature**

\_\_\_\_\_  
**Date (dd/mm/yy)**

## Experimental Site

### Oncodesign Secondary Establishment

Oncodesign Biotechnology  
25-27 avenue du Québec  
91140 Villebon-sur-Yvette  
France

☎: +33 (0)1 69 29 60 00

Site Authorization: Agreement No. B 91 962 106

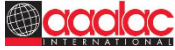

### CEA Fontenay aux Roses (CEA-FAR)

CEA - Commissariat à l'Energie Atomique  
18, Route du Panorama  
92265 Fontenay-aux-Roses  
France

Site Authorization: Agreement No. D92-032-02

## Study Summary

| Aim                                                                                                                                                        |                                                                                                                                                                                                                                                                                                                                                                                                                                                                                                                                                                                                                                                                                                           |
|------------------------------------------------------------------------------------------------------------------------------------------------------------|-----------------------------------------------------------------------------------------------------------------------------------------------------------------------------------------------------------------------------------------------------------------------------------------------------------------------------------------------------------------------------------------------------------------------------------------------------------------------------------------------------------------------------------------------------------------------------------------------------------------------------------------------------------------------------------------------------------|
| The goal of this study was to evaluate the therapeutic efficacy of anti-RBD-S-SARS-CoV-2/Wuhan IgY antibodies in the COVID-19 golden Syrian hamster model. |                                                                                                                                                                                                                                                                                                                                                                                                                                                                                                                                                                                                                                                                                                           |
| Study Timetable                                                                                                                                            |                                                                                                                                                                                                                                                                                                                                                                                                                                                                                                                                                                                                                                                                                                           |
| Protocol:                                                                                                                                                  | 08 July 2021                                                                                                                                                                                                                                                                                                                                                                                                                                                                                                                                                                                                                                                                                              |
| Reception of animals:                                                                                                                                      | 13 July 2021                                                                                                                                                                                                                                                                                                                                                                                                                                                                                                                                                                                                                                                                                              |
| Randomization:                                                                                                                                             | 19 July 2021                                                                                                                                                                                                                                                                                                                                                                                                                                                                                                                                                                                                                                                                                              |
| Treatment Period:                                                                                                                                          | 19 to 22 July 2021                                                                                                                                                                                                                                                                                                                                                                                                                                                                                                                                                                                                                                                                                        |
| First animal euthanized:                                                                                                                                   | 23 July 2021                                                                                                                                                                                                                                                                                                                                                                                                                                                                                                                                                                                                                                                                                              |
| Last animal euthanized:                                                                                                                                    | 23 July 2021                                                                                                                                                                                                                                                                                                                                                                                                                                                                                                                                                                                                                                                                                              |
| Protocol                                                                                                                                                   |                                                                                                                                                                                                                                                                                                                                                                                                                                                                                                                                                                                                                                                                                                           |
| Test Substance (batch):                                                                                                                                    | <ul style="list-style-type: none"> <li>Group A: Anti-RBD-IgY (for IN, batch: 12-2020-2)</li> </ul>                                                                                                                                                                                                                                                                                                                                                                                                                                                                                                                                                                                                        |
| Animals:                                                                                                                                                   | <ul style="list-style-type: none"> <li>18 healthy golden Syrian Hamsters (18 females), 6-8 weeks old at reception, were obtained from Janvier Labs.</li> </ul>                                                                                                                                                                                                                                                                                                                                                                                                                                                                                                                                            |
| Randomization:                                                                                                                                             | <ul style="list-style-type: none"> <li>Animals were weighed, then allocated into 3 homogenous groups of 6 animals.</li> </ul>                                                                                                                                                                                                                                                                                                                                                                                                                                                                                                                                                                             |
| Disease induction:                                                                                                                                         | <ul style="list-style-type: none"> <li>Groups A and B received SARS-CoV-2 on D0 at a dose of <math>10^5</math> PFU via the intranasal (IN) route, in a volume of 35µL per nostril (total of 70µL). Group C was not challenged.</li> </ul>                                                                                                                                                                                                                                                                                                                                                                                                                                                                 |
| Treatment Schedule:                                                                                                                                        | <ul style="list-style-type: none"> <li>Treatments with test substances were performed following the schedules indicated below: <ul style="list-style-type: none"> <li>Group A animals (anti-RBD IgY, 4,6 mg) received the test compound by IN route (35µL per nostril) <b>3 times on Day 0 (t-1h, t+1h, t+6h)</b> and then twice daily (<b>BID</b>) from <b>Day 1 to Day 3, with an 8h interval</b> between each delivery. The <b>first treatment</b> was performed <b>1h before infection</b> with SARS-CoV-2.</li> <li>Group B animals (no test compound) remained unmanipulated before and after infection with SARS-CoV-2.</li> <li>Group C animals received no test compound.</li> </ul> </li> </ul> |
| Monitoring:                                                                                                                                                | <ul style="list-style-type: none"> <li>Body weight was recorded at least once a day after SARS-CoV-2 infection.</li> <li>A model-specific clinical follow-up was recorded daily after SARS-CoV-2 infection.</li> </ul>                                                                                                                                                                                                                                                                                                                                                                                                                                                                                    |
| qRT-PCR:                                                                                                                                                   | <ul style="list-style-type: none"> <li>Quantification of viral load by RT-qPCR was performed from lung samples taken on D4, using the ORF1ab gene.</li> <li>Quantification of cytokine gene expression by RT-qPCR was performed from lung samples taken on D4, using the TNFα, IFNγ, IL-2, IL-4, IL-6, IL-10, IL-12p40 and IL-21 genes.</li> </ul>                                                                                                                                                                                                                                                                                                                                                        |

|                                                                                                                                                                                                                                                                                                                                                                                                                                                                                                                                   |                                                                                                                                                                                                                                                                                                                                                                                                                                                                                                                                                                                                                                                                                                                                                                                                                                                                                                                                                                                                                                                                |
|-----------------------------------------------------------------------------------------------------------------------------------------------------------------------------------------------------------------------------------------------------------------------------------------------------------------------------------------------------------------------------------------------------------------------------------------------------------------------------------------------------------------------------------|----------------------------------------------------------------------------------------------------------------------------------------------------------------------------------------------------------------------------------------------------------------------------------------------------------------------------------------------------------------------------------------------------------------------------------------------------------------------------------------------------------------------------------------------------------------------------------------------------------------------------------------------------------------------------------------------------------------------------------------------------------------------------------------------------------------------------------------------------------------------------------------------------------------------------------------------------------------------------------------------------------------------------------------------------------------|
| <b>Virus TCID<sub>50</sub>:</b>                                                                                                                                                                                                                                                                                                                                                                                                                                                                                                   | <ul style="list-style-type: none"> <li>• Viral infectious particle titration using samples collected on D4 was performed using TCID<sub>50</sub> on Vero E6/TMPRSS2 cells.</li> </ul>                                                                                                                                                                                                                                                                                                                                                                                                                                                                                                                                                                                                                                                                                                                                                                                                                                                                          |
| <b>Lung histology:</b>                                                                                                                                                                                                                                                                                                                                                                                                                                                                                                            | <ul style="list-style-type: none"> <li>• Lung samples collected on D4 were scored for histomorphometric changes.</li> </ul>                                                                                                                                                                                                                                                                                                                                                                                                                                                                                                                                                                                                                                                                                                                                                                                                                                                                                                                                    |
| <b>Results</b>                                                                                                                                                                                                                                                                                                                                                                                                                                                                                                                    |                                                                                                                                                                                                                                                                                                                                                                                                                                                                                                                                                                                                                                                                                                                                                                                                                                                                                                                                                                                                                                                                |
| <b>Health Parameters:</b>                                                                                                                                                                                                                                                                                                                                                                                                                                                                                                         | <p>From D1 to D4, the non-challenged animals from Group B maintained a stable body weight. Conversely, challenged non-treated animals from Group C continuously lost weight after the viral challenge, reaching a mean of 91.5% of D0 body weight on D4. Animals from Group B lost a little less weight throughout the course of the in vivo phase, reaching respectively 95.8% and 95.33% of D0 body weight on D4.</p> <p>Statistical tests showed a significant effect of group on weight change throughout the 4 days of the study. On D4, there was a significant difference in body weight loss between Groups A and C, and B and C (Table S5).</p>                                                                                                                                                                                                                                                                                                                                                                                                       |
| <b>Efficacy:</b>                                                                                                                                                                                                                                                                                                                                                                                                                                                                                                                  | <p>Mean levels of viral RNA were approximately 3-fold lower in treated group A than in Challenged non-treated group B on D4. The differences were statistically significant (Table S7).</p> <p>Treatments were associated with a small decrease in TCID<sub>50</sub> (less than a 2-fold). However, these differences were not statistically significant (Table S9).</p> <p>IL-6 expression was strongly induced by the viral challenge as well: expression levels were higher in Group B than C (statistically significant, Table S13). Expression levels were also higher in treated Group A than in non-challenged Group C.</p> <p>IL-10 expression was strongly induced by the viral challenge with higher expression levels in Group B than C (statistically significant, Table S13). Expression levels were also higher in treated Group A than in non-challenged Group C. Expression IL-2, IL-4, IL-12p40 and IL-21 was not different across groups, including between challenged and non-challenged groups (no significant difference, Table S13).</p> |
| <b>Conclusions</b>                                                                                                                                                                                                                                                                                                                                                                                                                                                                                                                |                                                                                                                                                                                                                                                                                                                                                                                                                                                                                                                                                                                                                                                                                                                                                                                                                                                                                                                                                                                                                                                                |
| <ul style="list-style-type: none"> <li>• No signs of toxicity of the treatments on body weight were observed, compared to the non-treated challenged group (Group B).</li> <li>• On D4 RBD-IgY (Group A) was associated with a reduction in viral load measured by qRT-PCR in the lungs of the challenged animals, compared to the non-treated challenged animals. In coherence with that, a small non-significant reduction of viral infectious particles measured by TCID<sub>50</sub> was observed in these groups.</li> </ul> |                                                                                                                                                                                                                                                                                                                                                                                                                                                                                                                                                                                                                                                                                                                                                                                                                                                                                                                                                                                                                                                                |

# Table of Contents

|                                                          |                                     |
|----------------------------------------------------------|-------------------------------------|
| Study Management .....                                   | 2                                   |
| Experimental Site .....                                  | 3                                   |
| Study Summary .....                                      | 4                                   |
| Table of Contents .....                                  | 6                                   |
| List of Figures.....                                     | <b>Error! Bookmark not defined.</b> |
| List of Tables .....                                     | 8                                   |
| List of Abbreviations.....                               | 9                                   |
| 1 Study Aim .....                                        | 10                                  |
| 2 Materials and Methods .....                            | 10                                  |
| 2.1 Use of animals .....                                 | 10                                  |
| 2.1.1 Ethical statement.....                             | 10                                  |
| 2.1.2 Housing conditions .....                           | 10                                  |
| 2.2 SARS-CoV-2 virus .....                               | 10                                  |
| 2.3 Test and reference substances .....                  | 11                                  |
| 2.3.1 Test substance .....                               | 11                                  |
| 2.3.2 Vehicle .....                                      | 11                                  |
| 3 Experimental Design and Treatments .....               | 11                                  |
| 3.1 Overview.....                                        | 11                                  |
| 3.2 Animals .....                                        | 12                                  |
| 3.3 Randomization.....                                   | 12                                  |
| 3.4 Treatment schedule.....                              | 12                                  |
| 3.5 SARS-CoV-2 challenge (D0).....                       | 12                                  |
| 3.6 Euthanasia of animals on D4 (4DPI) .....             | 12                                  |
| 3.7 Sample list summary .....                            | 13                                  |
| 4 Ex vivo analysis .....                                 | 13                                  |
| 4.1 Virus load in lungs by genomic qRT-PCR (D4).....     | 13                                  |
| 4.2 Virus TCID <sub>50</sub> in lungs (Day 3) .....      | 13                                  |
| 4.3 Cytokine profiling in lungs by qRT-PCR (Day 4) ..... | 14                                  |
| 4.4 Lung histology (Day 4) .....                         | 15                                  |
| 5 Animal monitoring.....                                 | 16                                  |
| 5.1 Clinical monitoring.....                             | 16                                  |
| 5.2 Humane endpoints .....                               | 16                                  |
| 5.2.1 Anesthesia and analgesia .....                     | 17                                  |
| 5.2.2 Euthanasia and necropsy.....                       | 17                                  |
| 6 Data Presentation and Management .....                 | 17                                  |
| 6.1 Quality Assurance .....                              | 17                                  |
| 6.2 Health parameters.....                               | 17                                  |

|                                               |                                                                |                                     |
|-----------------------------------------------|----------------------------------------------------------------|-------------------------------------|
| 6.3                                           | Efficacy parameters .....                                      | 17                                  |
| 6.4                                           | Statistical tests.....                                         | 17                                  |
| 7                                             | Deviations to the study protocol.....                          | <b>Error! Bookmark not defined.</b> |
| 8                                             | Results .....                                                  | 17                                  |
| 8.1                                           | Randomization.....                                             | 17                                  |
| 8.2                                           | Health parameters.....                                         | 17                                  |
| 8.3                                           | Efficacy Parameters .....                                      | 18                                  |
| 8.3.1                                         | Viral RNA expression in the lungs.....                         | 18                                  |
| 8.3.2                                         | Viral load in the lungs determined by TCID <sub>50</sub> ..... | 18                                  |
| 8.3.3                                         | Lesion score in the lungs .....                                | 18                                  |
| 8.3.4                                         | Cytokine expression in the lungs.....                          | 18                                  |
| 9                                             | Conclusions.....                                               | 18                                  |
| 10                                            | Archiving.....                                                 | 19                                  |
| 11                                            | Confidential Disclosure Agreement.....                         | 19                                  |
| 12                                            | Bibliography.....                                              | 19                                  |
| 13                                            | Figures, Tables and Statistical Analyses .....                 | 20                                  |
| 13.1                                          | Randomization.....                                             | 20                                  |
| 13.2                                          | Health Parameters.....                                         | <b>Error! Bookmark not defined.</b> |
| 13.3                                          | Efficacy Parameters .....                                      | <b>Error! Bookmark not defined.</b> |
| Appendix A: Raw data .....                    |                                                                | 34                                  |
| 14                                            | Raw Data List .....                                            | 35                                  |
| 14.1                                          | List of full group names .....                                 | 35                                  |
| Appendix B: Protocol .....                    |                                                                | <b>Error! Bookmark not defined.</b> |
| Appendix C: Animal Health Report.....         |                                                                | <b>Error! Bookmark not defined.</b> |
| Appendix D: Test substance information .....  |                                                                | <b>Error! Bookmark not defined.</b> |
| Appendix E: Quality assurance statement ..... |                                                                | <b>Error! Bookmark not defined.</b> |

## List of Tables

|                                                                                                                                       |    |
|---------------------------------------------------------------------------------------------------------------------------------------|----|
| Table S1: Summary of mean body weight (g) on the day of randomization (D-3) of golden Syrian hamsters inoculated with SARS-CoV-2..... | 20 |
| Table S2: ANOVA test of the randomization criteria on D-3. ....                                                                       | 20 |
| Table S3: Summary of body weights expressed in grams (g) of golden Syrian hamsters. ....                                              | 21 |
| Table S4: Summary of body weights change expressed in % of D0 of golden Syrian hamsters. ....                                         | 22 |
| Table S5: Two-way ANOVA of the mean body weight change between D0 and D4.....                                                         | 23 |
| Table S6: Viral RNA expression level (mean and SD) in lung from golden Syrian hamsters. ....                                          | 24 |
| Table S7: ANOVA of viral RNA expression level in lung from golden Syrian hamsters. ....                                               | 25 |
| Table S8: Viral load determined by TCID <sub>50</sub> (mL/g of lung, mean + SD) in lung from golden Syrian hamsters. ....             | 26 |
| Table S9: ANOVA of viral load by TCID <sub>50</sub> in lung from golden Syrian hamsters.....                                          | 27 |
| Table S10: Summary of the lesion score in the lungs of golden Syrian hamsters.....                                                    | 28 |
| Table S11: ANOVA of the lesion scores in lung from golden Syrian hamsters.....                                                        | 29 |
| Table S12: Quantitation of the cytokine expression levels in the lungs of golden Syrian hamsters expressed as $2^{-\Delta ct}$ . .... | 30 |
| Table S13: ANOVA on the cytokine expression levels in the lungs of golden Syrian hamsters. ....                                       | 32 |



## List of Abbreviations

|       |                      |
|-------|----------------------|
| Adm   | Administration       |
| ANOVA | Analysis of variance |
| BW    | Body weight          |
| DR    | Day of randomization |
| DX    | Day of measurement   |
| FD    | Found dead           |
| IN    | Intranasal           |
| IP    | Intraperitoneal(ly)  |
| IV    | Intravenous          |
| NA    | Not applicable       |
| ND    | Not determined       |
| N°    | Number of            |
| NS    | Not significant      |
| p     | Probability          |
| Ref   | Reference            |
| SC    | Subcutaneous(ly)     |
| SD    | Standard deviation   |
| Sign  | Significant          |
| V     | Volume               |
| vs    | Versus               |

# 1 Study Aim

The goal of the present study was to evaluate the therapeutic efficacy of IgYs developed by Norimmun against SARS-CoV-2 in the COVID-19 golden Syrian hamster model.

## 2 Materials and Methods

### 2.1 Use of animals

#### 2.1.1 Ethical statement

Animal housing and experimental procedures were conducted according to the French and European Regulations and the National Research Council Guide for the Care and Use of Laboratory Animals [1], [2]. The animal facility is authorized by the French authorities (CFH: Agreement N° B 91 962 106). All procedures on non-infected animals (including surgery, anesthesia and euthanasia as applicable) used in the current study are submitted to the Institutional Animal Care and Use Committee of Oncodesign (Oncomet) approved by French authorities [CNREEA agreement N° 91 (Oncodesign)].

The animal BSL3 facility is authorized by the French authorities (Agreement N° D92-032-02). All procedures on SARS-CoV-2 infected animals (including surgery, anesthesia and euthanasia as applicable) used in the current study (Ethical protocol: CEA-FAR APAFIS #27637-2020101209323274 v1) are submitted to the Institutional Animal Care and Use Committee of CEA approved by French authorities (CETEA DSV – n° 44).

#### 2.1.2 Housing conditions

Animals were maintained in specific-pathogen free health status according to the Federation for Laboratory Animal Science Associations guidelines. Animals were individually identified. Animals were maintained in housing rooms under controlled environmental conditions:

- temperature:  $22 \pm 2^{\circ}\text{C}$ ,
- humidity  $55 \pm 10\%$ ,
- photoperiod (12h light and 12h dark),
- H14 filtered air
- minimum of 12 air exchanges per hour with no recirculation.

Each cage was labeled with a specific code. Animal enclosures provided sterile and adequate space with bedding material, food and water, environmental and social enrichment (group housing) as described below:

- IsoRat900N biocontainment system (Tecniplast, France),
- Poplar bedding (Select fine, Safe, France),
- A04 SP-10 diet (Safe, France),
- Tap water
- Environmental enrichment
  - Tunnel
  - Wood sticks

### 2.2 SARS-CoV-2 virus

- SARS-CoV-2 strain “Slovakia/SK-BMC5/2020”, originally provided by the European Virus Archive global (EVAg) (GISAID EPI\_ISL\_417879, <https://www.european-virus-archive.com/virus/sars-cov-2-strain-slovakiask-bmc52020>), produced and titrated by Oncodesign on VeroE6-TMPRSS2 cells, was used for hamster infection. The strain belongs to the GH clade.
- Virus production was performed in T175 flasks seeded with  $50 \times 10^6$  VeroE6-TMPRSS2 cells and in a 40mL final volume. Cell counts and viability were assessed by 0.25% trypan blue exclusion assay by ViCell apparatus. After 48hrs of infection time frame (with 0.001-0.005 MOI of SARS-CoV-2 virus), cytopathogenic effects were confirmed under microscope observation. Culture supernatant was harvested, centrifuged (5min at 5000g) and aliquoted (1mL aliquots).
- Virus stock TCID<sub>50</sub> titers were determined on VeroE6-TMPRSS2 cells. About two hours before testing, cells were plated in 96-well plate at the density of  $2 \times 10^4$  cells per well in a volume of 200  $\mu\text{L}$  of complete growth medium (DMEM 10% FCS). Cells were infected with serial dilutions of virus stock (8-plicates; 1<sup>st</sup>

dilution 1:100; 5-fold serial dilutions) for 1h at 37°C. Fresh medium was added for 48 hours and a MTS-PMS assay was then performed, according to provider protocol (Promega, reference #G5430). Plates were read using an ELISA Plate reader and the data was recorded. Infectivity is expressed as TCID<sub>50</sub>/mL/48h based on the Spearman-Kärber formula.

## 2.3 Test and reference substances

### 2.3.1 Test substance

Test substances listed in the table below were provided by the sponsor.

| Test substance                 | Batch     | Concentration - Quantity (unit) | Storage |
|--------------------------------|-----------|---------------------------------|---------|
| Group A: Anti-RBD-IgY (for IN) | 12-2020-2 | 65.7 mg/mL - 7 mL               | 2-8°C   |

All remaining test substances were destroyed at the end of the study.

- ✓ The test substance anti-CoV-2 IgY was provided as a ready-to-use liquid. For group A, B and D, IgY-aliquots were shaken before use and volume extracted from the tubes was used directly for IN administration. No dilution was required. For group C, IgY-solution was diluted 60x in drinking water (150mL water bottles replaced daily and prepared with 2.5mL of test compound + 147.5mL H<sub>2</sub>O).
- ✓ **Storage:** The test item was stored at 2-8°C.
- ✓ **Preparation and use:** Inoculations was performed after dilution in the study vehicle.
- ✓ The test substance pegIFNα2a was provided as a ready-to-use liquid (reference: 008767, PEGASYS) in syringes (135µg/0.5mL each).
- ✓ **Storage:** The test item was be stored at 2-8°C.
- ✓ **Preparation and use:** Inoculations were performed after dilution in the study vehicle.

### 2.3.2 Vehicle

- ✓ The formulation vehicle was provided by Oncodesign.
- ✓ **Standard Vehicle:** Sodium chloride 0.9% (Osalia 100mL).

## 3 Experimental Design and Treatments

### 3.1 Overview

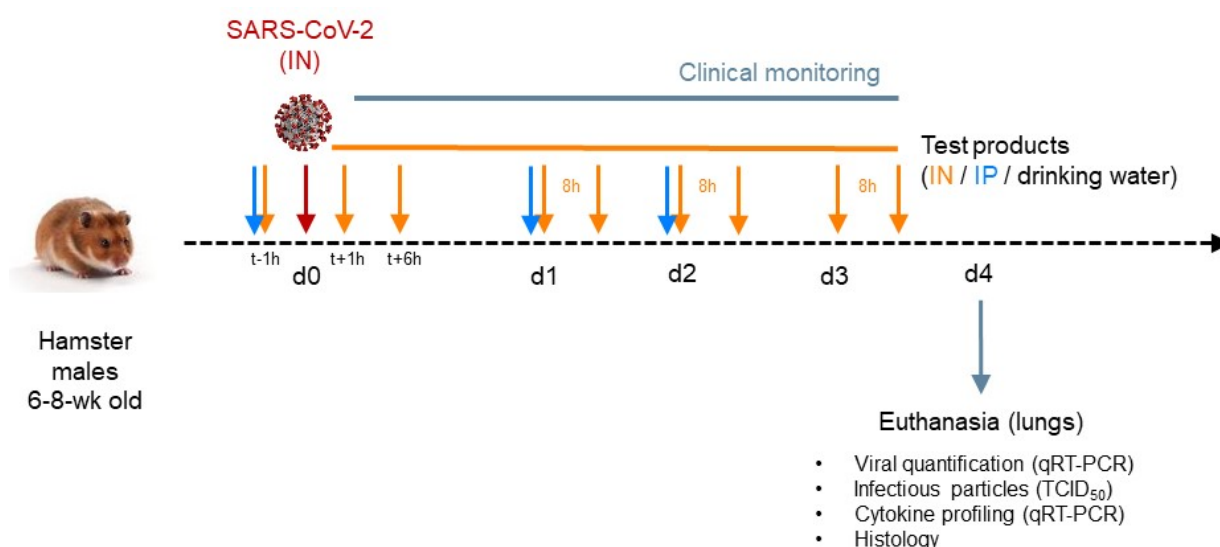

### 3.2 Animals

Healthy golden Syrian Hamsters (18 females), 6-8 weeks old at reception, were obtained from Janvier Labs.

### 3.3 Randomization

Animals were weighed, then allocated into 3 homogenous groups of 6 animals. Animals were labeled on the skin back (1cm<sup>2</sup> shaved area) using animal-dedicated pencils.

### 3.4 Treatment schedule

- ✓ The administration route of the test substances had been chosen by the sponsor.
  - The test substance anti-CoV-2 IgY was either delivered using the intranasal (IN) route, or in the drinking water, without anesthesia. Anesthesia cannot be applied more than once a day.
  - The test substance pegIFN $\alpha$ 2a was delivered using the intraperitoneal (IP) route).
  - The first treatment was performed 1h before infection with SARS-CoV-2.
- ✓ Treatments with test substances were performed following the schedules indicated below:
  - Group A animals (anti-RBD IgY, 4,6 mg) received the test compound by **IN** route (35 $\mu$ L per nostril) **3 times on Day 0 (t-1h, t+1h, t+6h)** and then twice daily (**BID**) from **Day 1 to Day 3, with an 8h interval** between each delivery. The **first treatment** was performed **1h before infection** with SARS-CoV-2.
  - Group B animals (no test compound) remained unmanipulated before and after infection with SARS-CoV-2.
  - Group C animals (no test compound) remained fully unmanipulated (no SARS-CoV-2 infection).

The treatment schedule is summarized in the table below:

| Group        | No. animals | Test           | Treatment schedule                                                  | Dosage/ injection              | Total quantity* | Virus (IN, d0)      | End point |
|--------------|-------------|----------------|---------------------------------------------------------------------|--------------------------------|-----------------|---------------------|-----------|
| A<br>RBD-IgY | 6           | anti-CoV-2 IgY | 3x on D0 (IN)<br>(t-1h/+1h/+6h)<br>+ BID (8h delay; IN)<br>(D1/2/3) | 4.6 mg<br>(35 $\mu$ L/nostril) | 323 mg          | 10 <sup>5</sup> pfu | d4        |
| B            | 6           | No             | N.A.                                                                | N.A.                           | N.A.            | 10 <sup>5</sup> pfu | d4        |
| C            | 6           | No             | N.A.                                                                | N.A.                           | N.A.            | No                  | d4        |

IN: intra-nasal; IP: intraperitoneal. \* including a minimal 30% test product excess (average hamster weight of 120g).

### 3.5 SARS-CoV-2 challenge (D0)

- All the animals from groups A and B (total n=30) received SARS-CoV-2 on D0.
- Group C animals (n=6) remained unchallenged.
- The administration route of SARS-CoV-2 had been chosen by Oncodesign. The treatment was administered by intranasal route (IN) under a total volume of 70 $\mu$ L (35 $\mu$ L per nostril) on Isoflurane-anesthetized animals. An intranasal dose of 10<sup>5</sup> PFU per animal was administered.

### 3.6 Euthanasia of animals on D4 (4DPI)

- The infected animals of all study groups A/B and unchallenged animals of group C, (n=6 animals per group, total n=18) were terminated on Day 4 post-infection.
- Animals were deeply anesthetized using a cocktail of Zoletil (30mg/kg – 0.6mL/kg) and xylazine (10mg/kg – 0.5mL/kg) injected by intraperitoneal route. Gentle cervical dislocation followed by thoracotomy were performed before lung collection.

- Superior right lobe was put in RNA Later overnight at 4°C, then stored at -80°C until RNA extraction for quantification of viral load by qRT-PCR.
- Middle, post-caval and inferior right lobes were snap frozen in liquid nitrogen (one lobe per tube), then stored at -80°C until quantification of viral infectious particles (TCID<sub>50</sub>).
- Left lungs were put in formalin for histology for at least 24 hours, followed by paraffin embedding. The weight of the lobe was recorded at time of sample transfer into the formalin tube (difference between tube weight without vs. with sample).

### 3.7 Sample list summary

- The following table provides an overview of the harvested samples in the course of the study.

| Study Day | Date        | Group / Number of animals | Action / Procedure / Samples<br>(animal related activity other than routine) | Number of samples |
|-----------|-------------|---------------------------|------------------------------------------------------------------------------|-------------------|
| D0        | 19-Jul-2021 | Groups A-B / 12           | SARS-CoV-2 challenge                                                         | -                 |
| D4        | 23-Jul-2021 | Groups A-B-C / 18         | Endpoint 4dpi<br>(terminal lung harvest)                                     | 18 lung series    |

## 4 Ex vivo analysis

### 4.1 Virus load in lungs by genomic qRT-PCR (D4)

- Quantification of viral load by RT-qPCR was done from lung using viral ORF1ab gene.
- Extraction of viral RNA was performed using the Macherey Nagel NucleoSpin 96 RNA, 96-well kit for RNA purification (ref. #740709.4). RNA was frozen at -80°C until RT-qPCR.
- RT was performed with the High Capacity cDNA Reverse Transcription Kit from Applied Biosystem (ref. # 4368813).
- cDNA quantification by real time quantitative PCR was performed with primers conditions targeting ORF1ab gene. Amplifications was performed using a QuantStudio 7 Flex from Applied Biosystem and adjoining software.
- SYBR Green technology was used for PCR product detection & quantification (PowerSYBR green PCR Master Mix – AppliedBiosystems, ref. #4367659).

| Primers and Probes |                            |
|--------------------|----------------------------|
| Name               | Sequences (5'-3')          |
| ORF1ab gene nCoV   |                            |
| ORF1ab_Fw          | CCGCAAGGTTCTTCTTCGTAAG     |
| ORF1ab_Rv          | TGCTATGTTTAGTGTTCCAGTTTTTC |

### 4.2 Virus TCID<sub>50</sub> in lungs (D4)

The tissue culture infective dose that causes 50% cytotoxicity (TCID<sub>50</sub>) assay is a quantitative method for assessing the infectivity of a virus stock. One TCID<sub>50</sub> is defined as the amount of pathogen that causes death of 50% of cells (Reed and Muench, 1938), so TCID<sub>50</sub> depends on the ability of the virus to kill the cells in culture. Infectivity is expressed as TCID<sub>50</sub>/mL/48h based on the Spearman-Kärber formula.

- VeroE6-TMPRSS2 cells were counted and their viability was assessed by 0.25% trypan blue exclusion assay by ViCell apparatus.
- One day before testing, cells were plated in a 96-well plate at the density of 2x10<sup>4</sup> cells per well in a volume of 200 µL of complete growth medium (DMEM 10% FCS).

- Cells were infected with serial dilutions of the lung homogenate (triplicate) for 1h at 37°C. Fresh medium was added for 48 hours
- 48 hours after cell infection, an MTS-PMS assay was performed. Assay was performed according to provider protocol (Promega ref#G5430). After discarding all supernatant, 100µL of fresh medium and 20µL of MTS-PMS reagent are added to the culture wells. After a maximum of 4 hours, plates were read using an ELISA Plate reader and data was recorded (OD value in negative cell control > 1.500).

### 4.3 Cytokine profiling in lungs by qRT-PCR (D4)

- ✓ Cytokine gene expression in lungs was determined for 8 target genes:

TNFα  
IFNγ  
IL-2  
IL-4  
IL-6  
IL-10  
IL-12p40  
IL-21

- ✓ Primer sequences for each target gene are provided in the following table:

| Primers and Probes |                                                                                                                                    |
|--------------------|------------------------------------------------------------------------------------------------------------------------------------|
| Name               | Sequences (5'-3')                                                                                                                  |
| <b>TNFα</b>        | Fw : TGAGCCATCGTGCCAATG<br>Rv : AGCCCGTCTGCTGGTATCAC<br>Probe : 5'-(6FAM)-CGG CAT GTC TCT CAA AGA CAA CCA G-(TAMRA)-3'             |
| <b>IFNγ</b>        | Fw : TGTTGCTCTGCCTCACTCAGG<br>Rv : AAGACGAGGTCCCCTCCATTC<br>Probe : 5'-(6FAM) TGG CTG CTA CTG CCA GGG CAC ACT C-(TAMRA)-3'         |
| <b>IL-2</b>        | TBD                                                                                                                                |
| <b>IL-4</b>        | Fw : ACAGAAAAAGGGACACCATGCA<br>Rv : GAAGCCCTGCAGATGAGGTCT<br>Probe : 5'-(6FAM) AGA CGC CCT TTC AGC AAG GAA GAA CTC C-(TAMRA)-3'    |
| <b>IL-6</b>        | Fw : AGACAAAGCCAGAGTCATT<br>Rv : TCGGTATGCTAAGGCACAG<br>Probe : TBD                                                                |
| <b>IL-10</b>       | Fw : GGTTGCCAAACCTTATCAGAAATG<br>Rv : TTCACCTGTTCCACAGCCTTG<br>Probe : 5'-(6FAM) TGC AGC GCT GTC ATC GAT TTC TCC C-(TAMRA)-3'      |
| <b>IL-12p40</b>    | Fw : AATGCGAGGCAG CAAATTACTC<br>Rv : CTGCTCTTGACGTTGAACTTCAAG<br>Probe : 5'-(6FAM)-CCT GCT GGT GGC TGA CTG CAA TCA-(TAMRA)-3'      |
| <b>IL-21</b>       | Fw : GGACAGTGGCCCATA AAACAAG<br>Rv : TTCAACACTGTCTATAAGATGACGAAGTC<br>Probe : 5'-(6FAM)-CAA GGG CCA GAT CGC CTC CTG ATT-(TAMRA)-3' |



#### 4.4 Lung histology (D4)

Left lung specimens harvested at euthanasia were embedded in paraffin (1 slide by animal). Sections of 5  $\mu$ m thickness were cut and mounted on SuperFrost plus glass slides, and stained with H&P (Hematoxylin-Phloxin) to visualize histomorphometric changes. Slides were scanned using the NanoZoomer Digital Pathology System C9600-02, and analyzed using Definiens software.

For each section, several criteria were evaluated:

1. Recruitment of inflammatory cells for bronchial and alveolar walls;
2. Presence of pulmonary edema;
3. Presence of alveolar hemorrhage;

A scoring grid was used as follows:

| Score | Inflammation                     | Edema    | Hemorrhage |
|-------|----------------------------------|----------|------------|
| 0     | no pathological changes          | Absence  | Absence    |
| 1     | affected area $\leq$ 10%         | Presence | Presence   |
| 2     | affected area $>10\%$ to $<50\%$ |          |            |
| 3     | affected area $\geq 50\%$        |          |            |

Examples of images and corresponding scoring are provided below for each criterion.

##### 1. Inflammation

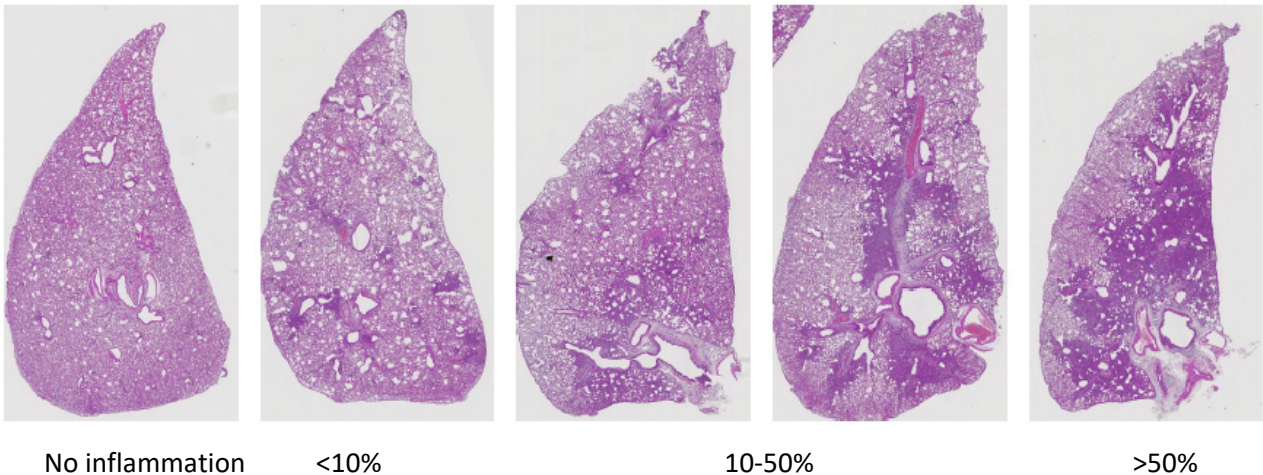

##### 2. Pulmonary edema

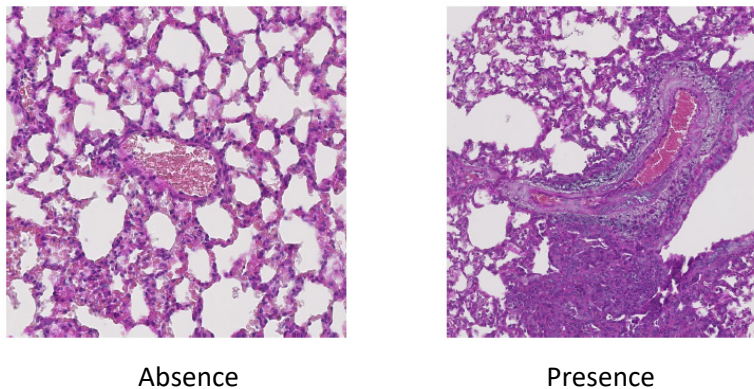

### 3. Alveolar hemorrhage

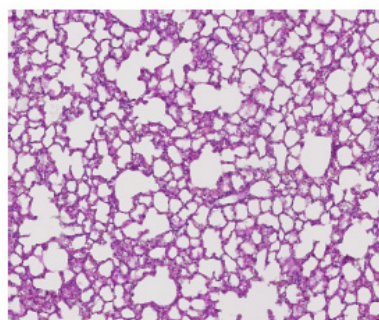

Absence

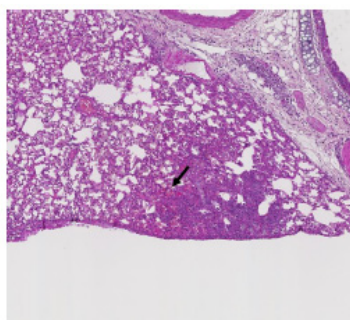

Presence

## 5 Animal monitoring

### 5.1 Clinical monitoring

Animal viability, behavior and body weight were monitored daily after SARS-CoV-2 infection.

In the context of infection with the Slovakia/SK-BMC5/2020 SARS-CoV-2 strain, body weight is the only relevant clinical sign.

Historical accumulation of data obtained from daily clinical follow-up after SARS-CoV-2 infection did not show any significant clinical score, using the listed parameters below:

- Body weight loss
- Piloerection (absence – slight – marked)
- Behavior (normal – less mobile – amorphous or isolated)
- Posture (normal – abnormal – hunched)
- Cough (presence or absence)
- Sneeze (presence or absence)

### 5.2 Humane endpoints

Humane endpoints requiring specific action had been established as follows:

- Subcutaneous rehydration with Ringer Lactate would be performed in case of a body weight loss  $\geq 15\%$  (compared to a reference day e.g. the first day of treatment). If transient toxicity were to be suspected, treatment would be stopped.
- If dehydration were to be observed, animals would be rehydrated with fluid or provided with hydrogel.

Humane endpoints requiring euthanasia [3], [4] had been established as follows:

- Twenty percent body weight loss (compared to the first day of treatment or maximum weight) lasting for a maximum of two consecutive days,
- Signs of pain, suffering or distress: pain posture, pain face mask, abnormal behavior or vocalization,
- Poor body condition, emaciation, cachexia, dehydration,
- Bladder outflow obstruction or diarrhea over a 48h period,
- Prolonged absence of voluntary responses to external stimuli,
- Rapid labored breathing,
- Anemia, significant bleeding,
- Bloodstained or mucopurulent discharge from any orifice,
- Neurologic signs: circling, convulsion, hind limb paralysis,
- Sustained decrease in body temperature,
- Abdominal distension.



### 5.2.1 Anesthesia and analgesia

Isoflurane gas anesthesia was used for IN infections and treatment administrations.

If necessary, non-pharmacological care, such as rehydration or gel diet, would have been provided. Additionally, pharmacological care that did not interfere with the study would have been provided at the recommendation of the attending veterinarian.

### 5.2.2 Euthanasia and necropsy

Euthanasia of animals was performed under deep anesthesia using a cocktail of Zoletil (30mg/kg – 0.6mL/kg) and xylazine (10mg/kg – 0.5mL/kg) injected by intraperitoneal route followed by exsanguination (if required) and cervical dislocation. If physical methods for euthanasia (cervical dislocation) were necessary, they were performed by highly skilled and trained technicians.

Necropsy (macroscopic examination) was performed on all animals euthanized in the study, and, if possible, on all euthanized moribund animals; and those found dead.

## 6 Data Presentation and Management

The raw data was provided to the study sponsor as MS Excel® files after the end of the in vivo phase, as soon as the data became available.

### 6.1 Quality Assurance

Internal quality control checking was performed on raw data and worksheets during and after completion of this study and documented by a dated signature with statement to the effect that the data are accurate.

### 6.2 Health parameters

- Individual and mean body weight of animals were provided,
- Individual and mean clinical scores of animals were provided.

### 6.3 Efficacy parameters

- Individual and mean lung viral load determined by RT-qPCR were provided
- Individual and mean lung viral infectious particles determined by TCID<sub>50</sub> were provided
- Individual and mean lung cytokine expression level determined by RT-qPCR were provided
- Individual and mean lung histopathology analysis were provided.

### 6.4 Statistical tests

GraphPad Prism® (GraphPad Prism Software, USA) was used for preparation of the tables, figures and statistical analyses. Statistical analyses comparisons were performed using an ANOVA for analyses between all groups. A p value ≤ 0.05 was considered significant.

## 7 Results

### 7.1 Randomization

On the day of randomization (D-3), mean body weight was 90.89g (Table S1). Statistical analysis showed no significant differences between groups (Table S2).

### 7.2 Health parameters

Animal body weight and clinical scores were monitored throughout the study. Clinical scores remained equal to zero, with the animals showing no clinical signs. Thus, the only relevant health parameter was body weight (Table S3). Body weights, expressed as a percentage of body weight compared to the weight on D0, are shown in **Error! Reference source not found.** and Table S4.

From D0 to D4, the non-challenged animals from Group C maintained a stable body weight. Conversely, challenged and non-treated animals from Group B continuously lost weight after the viral challenge, reaching a mean of 91.5% of D0 body weight on D4. Animals from Group A lost a little less weight throughout the course of the in vivo phase, reaching respectively 95.8% and 95.33% of D0 body weight on D4.

Statistical tests showed a significant effect of the group on weight change throughout the 4 days of the study. On D4, there was a significant difference in body weight loss between Groups A and C, and B and C (Table S5).

## 7.3 Efficacy Parameters

### 7.3.1 Viral RNA expression in the lungs

Animals were inoculated with the viral strain on D0 and treated on from D0 to D3. Quantification of the viral gene ORF1ab and of a housekeeping gene ( $\beta$  actin) was performed using RT-qPCR on lung samples collected from the animals on D4 (**Error! Reference source not found.** and Table S6). Results are expressed as a relative expression level between the two genes ( $2^{-\Delta CT}$ ).

Mean levels of viral RNA were approximately 3-fold lower in treated group A than in challenged non-treated group B on D4. The differences were statistically significant (Table S7).

### 7.3.2 Viral load in the lungs determined by TCID<sub>50</sub>

Lung viral load (in number of infectious viral particles per g of lung) was determined from virus titers based on samples taken from the animals on D4. The results are summarized in **Error! Reference source not found.** and Table S8.

### 7.3.3 Lesion score in the lungs

Lesion scoring was performed based on histomorphometric analysis of lung samples (inflammation, edema and hemorrhage) collected from the animals on D4 (**Error! Reference source not found.** and Table S10).

### 7.3.4 Cytokine expression in the lungs

Quantification of the expression of cytokine genes (TNF $\alpha$ , IFN $\gamma$ , IL-2, IL-4, IL-6, IL-10, IL-12p40 and IL-21) and of a housekeeping gene ( $\beta$  actin) was performed using RT-qPCR on lung samples collected from the animals on D4 (**Error! Reference source not found.** and Table S12). Results are expressed as a relative expression level between the two genes ( $2^{-\Delta CT}$ ).

IFN $\gamma$  expression was strongly induced by the viral challenge, as expression levels were much higher in Group B than C (statistically significant, Table S13). Expression levels were also higher in treated Group A than in non-challenged Group C.

IL-6 expression was strongly induced by the viral challenge as well: expression levels were higher in Group B than C (statistically significant, Table S13). Expression levels were also higher in treated Group A than in non-challenged Group C. Additionally, no treated Group exhibited significantly different IL-6 expression compared to Group D (challenged, non-treated).

IL-10 expression was strongly induced by the viral challenge with higher expression levels in Group B than C (statistically significant, Table S13). Expression levels were also higher in treated Group A than in non-challenged Group C.

Expression IL-2, IL-4, IL-12p40 and IL-21 was not different across groups, including between challenged and non-challenged groups (no significant difference, Table S13).

## 8 Conclusions

- No signs of toxicity of the treatments on body weight were observed, regardless of the route of administration, compared to the non-treated challenged group (Group B).
- On D4, treatments with RBD-IgY (Group B) were associated with a reduction in viral load measured by qRT-PCR in the lungs of the challenged animals, compared to the non-treated challenged animals. In

coherence with that, a small non-significant reduction of viral infectious particles measured by TCID<sub>50</sub> was observed in these groups.

- On D4, IFN $\gamma$ , IL-6, and IL-10 expression had been induced in the challenged non-treated groups compared to the non-challenged group (Group C). No treated group exhibited differential lung expression of IFN $\gamma$  or IL-6 compared to the non-treated challenged group (Group B). Expression of IL-2, IL-4, IL-12p40 and IL-21 was not significantly induced by the viral challenge.

## 9 Archiving

Oncodesign will conserve documents, reagents, and samples for a duration of 3 years after the end of the study. The end of the study is defined as the date of the signature of the report by the study director.

At the end of this period, the archived content will be destroyed. Alternatively, the archives can be returned to the sponsor if specifically requested, at their expense.

## 10 Confidential Disclosure Agreement

The sponsor shall have the exclusive ownership of the results of the studies and research subject to the present agreement. Oncodesign agrees to maintain in confidence all confidential information. It is forbidden for Oncodesign to publish or to communicate any results without the written agreement of the sponsor. The results of the study can be freely used by the sponsor, for example for public presentations, documentation, marketing authorizations, publications, information for physicians and pharmacists, etc.

## 11 Bibliography

[1] Parlement européen et du Conseil du 22 septembre 2010. (2013, février 01)., *Décret n° 2013-118 du 1er février 2013 relatif à la protection des animaux utilisés à des fins scientifiques*.

[2] National Research Council (U.S.), Institute for Laboratory Animal Research (U.S.), and National Academies Press (U.S.), Eds., *Guide for the care and use of laboratory animals*, 8th ed. Washington, D.C: National Academies Press, 2011.

[3] P. Workman *et al.*, "Guidelines for the welfare and use of animals in cancer research," *Br. J. Cancer*, vol. 102, no. 11, pp. 1555–1577, May 2010, doi: 10.1038/sj.bjc.6605642.i

[4] Organisation For Economic Co-Operation And Development, "OECD Environmental Health and Safety Publications Series on Testing and Assessment No. 19. Guidance document on the recognition, assessment, and use of clinical signs as humane endpoints for experimental animals used in safety evaluation." Nov. 2000.

## 12 Figures, Tables and Statistical Analyses

### 12.1 Randomization

**Table S1: Summary of mean body weight (g) on the day of randomization (D-3) of golden Syrian hamsters inoculated with SARS-CoV-2.** Animals were randomized on D-3, inoculated with the viral strain on D0 and treated from D0 to D3. D4 was the last day of the study.

| Group                    | n | Mean  | SD   | Minimum | Maximum |
|--------------------------|---|-------|------|---------|---------|
| Group A - RBD-IgY IN     | 6 | 90.50 | 4.64 | 86      | 98      |
| Group B - non-treated    | 6 | 90.67 | 6.98 | 80      | 97      |
| Group C - non-challenged | 6 | 91.83 | 5.12 | 86      | 99      |

**Table S2: ANOVA test of the randomization criteria on D-3.**

| ANOVA table                 | SS    | DF | MS    | F (DFn, DFd)       | P value  |
|-----------------------------|-------|----|-------|--------------------|----------|
| Treatment (between columns) | 23.56 | 5  | 4.711 | F (5, 30) = 0.1375 | P=0.9823 |
| Residual (within columns)   | 1028  | 30 | 34.27 |                    |          |
| Total                       | 1052  | 35 |       |                    |          |

**Table S3: Summary of body weights expressed in grams (g) of golden Syrian hamsters.** Animals were randomized on D-3, inoculated with the viral strain on D0 and treated from D0 to D3. D4 was the last day of the study.

| Group                    |      | Study Days |       |       |       |       |
|--------------------------|------|------------|-------|-------|-------|-------|
|                          |      | 0          | 1     | 2     | 3     | 4     |
| Group A - RBD-IgY IN     | mean | 95.00      | 94.17 | 91.50 | 88.83 | 88.83 |
|                          | SD   | 5.48       | 5.23  | 5.61  | 5.64  | 5.49  |
|                          | n    | 6          | 6     | 6     | 6     | 6     |
| Group B - non-treated    | mean | 96.67      | 94.50 | 91.67 | 90.67 | 88.67 |
|                          | SD   | 6.98       | 7.40  | 7.42  | 7.31  | 7.76  |
|                          | n    | 6          | 6     | 6     | 6     | 6     |
| Group C - non-challenged | mean | 95.33      | 94.67 | 94.50 | 95.67 | 94.00 |
|                          | SD   | 5.20       | 6.15  | 7.42  | 6.77  | 8.29  |
|                          | n    | 6          | 6     | 6     | 6     | 6     |

**Table S4: Summary of body weights change expressed in % of D0 of golden Syrian hamsters.** Animals were randomized on D-3, inoculated with the viral strain on D0 and treated from D0 to D3. D4 was the last day of the study.

| Group                    |      | Study Days |       |       |        |       |
|--------------------------|------|------------|-------|-------|--------|-------|
|                          |      | 0          | 1     | 2     | 3      | 4     |
| Group A - RBD-IgY IN     | mean | 100.00     | 99.17 | 96.33 | 93.33  | 93.33 |
|                          | SD   | 0.00       | 1.47  | 1.86  | 2.80   | 3.01  |
|                          | n    | 6          | 6     | 6     | 6      | 6     |
| Group B - non-treated    | mean | 100.00     | 97.83 | 94.83 | 93.67  | 91.50 |
|                          | SD   | 0.00       | 1.83  | 3.54  | 3.98   | 3.39  |
|                          | n    | 6          | 6     | 6     | 6      | 6     |
| Group C - non-challenged | mean | 100.00     | 99.33 | 99.17 | 100.33 | 98.67 |
|                          | SD   | 0.00       | 3.08  | 3.37  | 3.14   | 4.08  |
|                          | n    | 6          | 6     | 6     | 6      | 6     |

**Table S5: Two-way ANOVA of the mean body weight change between D0 and D4**

| <b>ANOVA table</b>   | <b>SS (Type III)</b> | <b>DF</b> | <b>MS</b> | <b>F (DFn, DFd)</b> | <b>P value</b> |
|----------------------|----------------------|-----------|-----------|---------------------|----------------|
| <b>Interaction</b>   | 311.8                | 20        | 15.59     | F (20, 146) = 2.368 | P=0.0018       |
| <b>Row Factor</b>    | 987.8                | 4         | 246.9     | F (4, 146) = 37.52  | P<0.0001       |
| <b>Column Factor</b> | 487.7                | 5         | 97.55     | F (5, 146) = 14.82  | P<0.0001       |
| <b>Residual</b>      | 960.9                | 146       | 6.582     |                     |                |

| <b>Bonferroni's multiple comparisons test</b> | <b>95.00% CI of diff.</b> | <b>Below threshold?</b> | <b>Summary</b> | <b>Adjusted P Value</b> |
|-----------------------------------------------|---------------------------|-------------------------|----------------|-------------------------|
| <b>Group A vs. Group B</b>                    | -2.587 to 6.254           | No                      | ns             | >0.9999                 |
| <b>Group A vs. Group C</b>                    | -9.754 to -0.9131         | Yes                     | **             | <b>0.0065</b>           |
| <b>Group B vs. Group C</b>                    | -11.59 to -2.746          | Yes                     | ****           | <b>&lt;0.0001</b>       |

**Table S6: Viral RNA expression level (mean and SD) in lung from golden Syrian hamsters.** Animals were randomized on D-3, inoculated with the viral strain on D0 and treated from D0 to D3. D4 was the last day of the study. Samples for qPCR were taken on D4. Results are expressed as  $2^{-\Delta CT}$ .

| Group                    | n | Mean | SD   | Minimum | Maximum |
|--------------------------|---|------|------|---------|---------|
| Group A - RBD-IgY IN     | 6 | 0.92 | 0.26 | 0.53    | 1.14    |
| Group B - non-treated    | 6 | 2.86 | 1.33 | 1.15    | 4.27    |
| Group C - non-challenged | 6 | 0.02 | 0.01 | 0       | 0.04    |



**Table S7: ANOVA of viral RNA expression level in lung from golden Syrian hamsters.**

| <b>ANOVA table</b>                 | <b>SS</b> | <b>DF</b> | <b>MS</b> | <b>F (DFn, DFd)</b> | <b>P value</b>  |
|------------------------------------|-----------|-----------|-----------|---------------------|-----------------|
| <b>Treatment (between columns)</b> | 27.46     | 5         | 5.491     | F (5, 29) = 6.606   | <b>P=0.0003</b> |
| <b>Residual (within columns)</b>   | 24.10     | 29        | 0.8312    |                     |                 |
| <b>Total</b>                       | 51.56     | 34        |           |                     |                 |

**Bonferroni's multiple comparisons test:**

|                       | <b>Mean Diff.</b> | <b>95.00% CI of diff.</b> | <b>Summary</b> | <b>Adjusted P Value</b> |
|-----------------------|-------------------|---------------------------|----------------|-------------------------|
| <b>Groups A vs. B</b> | -1.945            | -3.628 to -0.2616         | *              | <b>0.0136</b>           |
| <b>Groups A vs. C</b> | 0.9017            | -0.7818 to 2.585          | ns             | >0.9999                 |

**Table S8: Viral load determined by TCID<sub>50</sub> (mL/g of lung, mean + SD) in lung from golden Syrian hamsters.**  
Animals were randomized on D0, inoculated with the viral strain on D0 and treated from D0 to D3. D4 was the last day of the study.

| Group                    | n | Mean     | SD       | Minimum  | Maximum  |
|--------------------------|---|----------|----------|----------|----------|
| Group A - RBD-IgY IN     | 6 | 2.17E+07 | 2.00E+07 | 1.97E+06 | 5.31E+07 |
| Group B - non-treated    | 6 | 2.47E+07 | 1.73E+07 | 5.90E+06 | 5.31E+07 |
| Group C - non-challenged | 6 | 5.20E+02 | 0.00E+00 | 5.20E+02 | 5.20E+02 |

**Table S9: ANOVA of viral load by TCID50 in lung from golden Syrian hamsters.**

| <b>ANOVA table</b>                 | <b>SS</b>  | <b>DF</b> | <b>MS</b>  | <b>F (DFn, DFd)</b> | <b>P value</b> |
|------------------------------------|------------|-----------|------------|---------------------|----------------|
| <b>Treatment (between columns)</b> | 4.325e+015 | 5         | 8.651e+014 | F (5, 29) = 2.207   | P=0.0808       |
| <b>Residual (within columns)</b>   | 1.137e+016 | 29        | 3.920e+014 |                     |                |
| <b>Total</b>                       | 1.569e+016 | 34        |            |                     |                |

**Table S10: Summary of the lesion score in the lungs of golden Syrian hamsters.** Animals were randomized on D-3, inoculated with the viral strain on D0 and treated from D0 to D3. D4 was the last day of the study.

| Group                    | n | Mean   | SD     | Minimum | Maximum |
|--------------------------|---|--------|--------|---------|---------|
| Group A - RBD-IgY IN     | 6 | 3.083  | 0.5164 | 2.5     | 3.75    |
| Group B - non-treated    | 6 | 2.292  | 0.2923 | 2       | 2.75    |
| Group C - non-challenged | 6 | 0.4583 | 0.4005 | 0       | 1       |

**Table S11: ANOVA of the lesion scores in lung from golden Syrian hamsters.**

|                                                     |                   |
|-----------------------------------------------------|-------------------|
| <b>ANOVA summary</b>                                |                   |
| <b>F</b>                                            | 11.72             |
| <b>P value</b>                                      | <b>&lt;0.0001</b> |
| <b>P value summary</b>                              | ****              |
| <b>Significant diff. among means (P &lt; 0.05)?</b> | Yes               |
| <b>R squared</b>                                    | 0.6690            |

**Bonferroni's multiple comparisons test:**

| <b>Bonferroni's multiple comparisons test</b> | <b>Mean Diff.</b> | <b>95.00% CI of diff.</b> | <b>Below threshold?</b> | <b>Summary</b> | <b>Adjusted P Value</b> |
|-----------------------------------------------|-------------------|---------------------------|-------------------------|----------------|-------------------------|
| <b>Groups A vs. B</b>                         | 0.7917            | -0.4009 to 1.984          | No                      | ns             | 0.6360                  |
| <b>Groups A vs. C</b>                         | 2.625             | 1.432 to 3.818            | Yes                     | ****           | <b>&lt;0.0001</b>       |
| <b>Groups B vs. C</b>                         | 1.833             | 0.6408 to 3.026           | Yes                     | ***            | <b>0.0005</b>           |

**Table S12: Quantitation of the cytokine expression levels in the lungs of golden Syrian hamsters expressed as  $2^{-\Delta Ct}$ . Animals were randomized on D-3, infected with SARS-CoV-2 on D0 and treated from D0 to D3. D4 was the last day the study.**

**IFN $\gamma$ :**

| Group                    | n | Mean     | SD       | Minimum  | Maximum  |
|--------------------------|---|----------|----------|----------|----------|
| Group A - RBD-IgY IN     | 6 | 1.29E-02 | 3.90E-03 | 8.11E-03 | 1.97E-02 |
| Group B - non-treated    | 6 | 1.69E-02 | 3.83E-03 | 1.09E-02 | 2.16E-02 |
| Group C - non-challenged | 6 | 1.83E-03 | 6.45E-04 | 1.29E-03 | 2.80E-03 |

**IL-2:**

| Group                    | n | Mean     | SD       | Minimum  | Maximum  |
|--------------------------|---|----------|----------|----------|----------|
| Group A - RBD-IgY IN     | 6 | 5.18E-04 | 2.48E-04 | 2.43E-04 | 8.79E-04 |
| Group B - non-treated    | 6 | 2.25E-04 | 9.54E-05 | 1.24E-04 | 3.94E-04 |
| Group C - non-challenged | 6 | 3.07E-04 | 2.04E-04 | 1.20E-04 | 6.53E-04 |

**IL-4:**

| Group                    | n | Mean     | SD       | Minimum  | Maximum  |
|--------------------------|---|----------|----------|----------|----------|
| Group A - RBD-IgY IN     | 6 | 2.19E-03 | 8.89E-04 | 9.38E-04 | 3.25E-03 |
| Group B - non-treated    | 6 | 1.65E-03 | 1.07E-03 | 5.74E-04 | 2.92E-03 |
| Group C - non-challenged | 6 | 1.56E-03 | 7.91E-04 | 9.38E-04 | 2.99E-03 |

**IL-6:**

| Group                    | n | Mean     | SD       | Minimum  | Maximum  |
|--------------------------|---|----------|----------|----------|----------|
| Group A - RBD-IgY IN     | 6 | 3.41E-03 | 1.69E-03 | 1.70E-03 | 6.28E-03 |
| Group B - non-treated    | 6 | 3.85E-03 | 1.26E-03 | 1.89E-03 | 5.01E-03 |
| Group C - non-challenged | 6 | 2.03E-04 | 7.94E-05 | 1.06E-04 | 2.97E-04 |

**IL-10:**

| Group                    | n |    |
|--------------------------|---|----|
| Group A - RBD-IgY IN     | 6 | 6. |
| Group B - non-treated    | 6 | 1. |
| Group C - non-challenged | 6 | 1. |

- Group A - Kombo-IgY IN
- Group B - RBD-IgY IN
- Group C - Kombo-IgY Drinking water
- Group D - Kombo-IgY IN + PegIFNa2a (IP)
- Group E - non-treated
- Group F - non-challenged

**IL-12p40:**

| Group                    | n | Mean     | SD       | Minimum  | Maximum  |
|--------------------------|---|----------|----------|----------|----------|
| Group A - RBD-IgY IN     | 6 | 4.56E-04 | 1.89E-04 | 2.63E-04 | 7.53E-04 |
| Group B - non-treated    | 6 | 2.66E-04 | 9.00E-05 | 1.57E-04 | 4.16E-04 |
| Group C - non-challenged | 6 | 2.05E-04 | 1.32E-04 | 1.04E-04 | 4.45E-04 |

IL-21:

| Group                    | n | Mean     | SD       | Minimum  | Maximum  |
|--------------------------|---|----------|----------|----------|----------|
| Group A - RBD-IgY IN     | 6 | 1.53E-03 | 5.72E-04 | 9.35E-04 | 2.46E-03 |
| Group B - non-treated    | 6 | 1.05E-03 | 3.64E-04 | 4.78E-04 | 1.45E-03 |
| Group C - non-challenged | 6 | 5.80E-04 | 4.89E-04 | 2.50E-04 | 1.55E-03 |

**Table S13: ANOVA on the cytokine expression levels in the lungs of golden Syrian hamsters.**

**IFNy:**

| ANOVA table                 | SS        | DF | MS         | F (DFn, DFd)      | P value            |
|-----------------------------|-----------|----|------------|-------------------|--------------------|
| Treatment (between columns) | 0.001705  | 5  | 0.0003409  | F (5, 29) = 11.05 | <b>P&lt;0.0001</b> |
| Residual (within columns)   | 0.0008947 | 29 | 3.085e-005 |                   |                    |
| Total                       | 0.002599  | 34 |            |                   |                    |

| Bonferroni's multiple comparisons test | 95.00% CI of diff.   | Below threshold? | Summary | Adjusted P Value |
|----------------------------------------|----------------------|------------------|---------|------------------|
| Groups A vs. B                         | -0.01429 to 0.006224 | No               | ns      | >0.9999          |
| Groups A vs. C                         | 0.0007680 to 0.02128 | Yes              | *       | <b>0.0269</b>    |
| Groups B vs. C                         | 0.004800 to 0.02531  | Yes              | ***     | <b>0.0009</b>    |

**IL-2:**

| ANOVA table                 | SS         | DF | MS         | F (DFn, DFd)       | P value  |
|-----------------------------|------------|----|------------|--------------------|----------|
| Treatment (between columns) | 3.761e-007 | 5  | 7.521e-008 | F (5, 29) = 0.6374 | P=0.6729 |
| Residual (within columns)   | 3.422e-006 | 29 | 1.180e-007 |                    |          |
| Total                       | 3.798e-006 | 34 |            |                    |          |

**IL-4:**

| ANOVA table                 | SS         | DF | MS         | F (DFn, DFd)       | P value  |
|-----------------------------|------------|----|------------|--------------------|----------|
| Treatment (between columns) | 6.349e-005 | 5  | 1.270e-005 | F (5, 29) = 0.8160 | P=0.5481 |
| Residual (within columns)   | 0.0004513  | 29 | 1.556e-005 |                    |          |
| Total                       | 0.0005148  | 34 |            |                    |          |

**IL-6:**

| ANOVA table                 | SS         | DF | MS         | F (DFn, DFd)      | P value         |
|-----------------------------|------------|----|------------|-------------------|-----------------|
| Treatment (between columns) | 7.412e-005 | 5  | 1.482e-005 | F (5, 29) = 5.387 | <b>P=0.0013</b> |
| Residual (within columns)   | 7.980e-005 | 29 | 2.752e-006 |                   |                 |
| Total                       | 0.0001539  | 34 |            |                   |                 |

| Bonferroni's multiple comparisons test | 95.00% CI of diff.    | Below threshold? | Summary | Adjusted P Value |
|----------------------------------------|-----------------------|------------------|---------|------------------|
| Groups A vs. B                         | -0.003499 to 0.002627 | No               | ns      | >0.9999          |
| Groups A vs. C                         | 0.0001450 to 0.006271 | Yes              | *       | <b>0.0339</b>    |
| Groups B vs. C                         | 0.0005810 to 0.006707 | Yes              | *       | <b>0.0102</b>    |

**IL-10:**

| ANOVA table                 | SS        | DF | MS         | F (DFn, DFd)      | P value            |
|-----------------------------|-----------|----|------------|-------------------|--------------------|
| Treatment (between columns) | 0.0006354 | 5  | 0.0001271  | F (5, 29) = 16.92 | <b>P&lt;0.0001</b> |
| Residual (within columns)   | 0.0002178 | 29 | 7.509e-006 |                   |                    |
| Total                       | 0.0008532 | 34 |            |                   |                    |

| Bonferroni's multiple comparisons test | 95.00% CI of diff.     | Below threshold? | Summary | Adjusted P Value  |
|----------------------------------------|------------------------|------------------|---------|-------------------|
| Groups A vs. B                         | -0.009374 to 0.0007455 | No               | ns      | 0.1610            |
| Groups A vs. C                         | 0.001071 to 0.01119    | Yes              | **      | <b>0.0084</b>     |
| Groups B vs. C                         | 0.005385 to 0.01551    | Yes              | ****    | <b>&lt;0.0001</b> |

**IL-12p40:**

| ANOVA table                 | SS         | DF | MS         | F (DFn, DFd)      | P value  |
|-----------------------------|------------|----|------------|-------------------|----------|
| Treatment (between columns) | 3.980e-007 | 5  | 7.959e-008 | F (5, 29) = 1.230 | P=0.3205 |
| Residual (within columns)   | 1.877e-006 | 29 | 6.471e-008 |                   |          |
| Total                       | 2.275e-006 | 34 |            |                   |          |



IL-21:

| ANOVA table                 | SS         | DF | MS         | F (DFn, DFd)      | P value  |
|-----------------------------|------------|----|------------|-------------------|----------|
| Treatment (between columns) | 4.783e-006 | 5  | 9.565e-007 | F (5, 29) = 2.080 | P=0.0967 |
| Residual (within columns)   | 1.334e-005 | 29 | 4.599e-007 |                   |          |
| Total                       | 1.812e-005 | 34 |            |                   |          |



## **Appendix A: Raw data**

## 13 Raw Data List

|                                                                                           |    |
|-------------------------------------------------------------------------------------------|----|
| Raw Data 1: Individual body weight (g) of golden Syrian hamsters infected with SARS-CoV-2 | 36 |
| Raw Data 2: Individual clinical scores and necropsy observations                          | 37 |
| Raw Data 3: Individual lung qPCR results                                                  | 38 |
| Raw Data 4: Individual TCID50 results on lung tissue.                                     | 39 |
| Raw Data 5: Individual histopathological scoring of lung tissue.                          | 40 |

### 13.1 List of full group names

| Group                    |
|--------------------------|
| Group A - RBD-IgY IN     |
| Group B - non-treated    |
| Group C - non-challenged |

**Raw Data 1: Individual body weight (g) of golden Syrian hamsters infected with SARS-CoV-2**

|         |    |           | D-3        | 0          | 1          | 2          | 3          | 4          |
|---------|----|-----------|------------|------------|------------|------------|------------|------------|
|         |    |           | 16/07/2021 | 19/07/2021 | 20/07/2021 | 21/07/2021 | 22/07/2021 | 23/07/2021 |
| Group A | A1 | Hamster # | 1          | 2          | 3          | 4          | 5          | 6          |
|         |    | 1         | 86         | 89         | 89         | 84         | 84         | 83         |
|         |    | 2         | 98         | 105        | 103        | 100        | 97         | 96         |
|         | A2 | 3         | 88         | 95         | 96         | 93         | 92         | 92         |
|         |    | 4         | 94         | 96         | 95         | 94         | 92         | 93         |
|         |    | 5         | 90         | 93         | 93         | 91         | 85         | 84         |
| Group B | B1 | 6         | 87         | 92         | 89         | 87         | 83         | 85         |
|         |    | 7         | 85         | 93         | 88         | 83         | 81         | 79         |
|         |    | 8         | 96         | 100        | 100        | 98         | 96         | 93         |
|         | B2 | 9         | 97         | 102        | 101        | 99         | 97         | 96         |
|         |    | 10        | 90         | 94         | 91         | 90         | 92         | 86         |
|         |    | 11        | 80         | 86         | 85         | 83         | 82         | 81         |
| Group C | C1 | 12        | 96         | 105        | 102        | 97         | 96         | 97         |
|         |    | 13        | 99         | 103        | 105        | 107        | 107        | 109        |
|         |    | 14        | 88         | 92         | 91         | 90         | 89         | 89         |
|         | C2 | 15        | 97         | 100        | 98         | 100        | 98         | 97         |
|         |    | 16        | 90         | 94         | 88         | 88         | 98         | 88         |
|         |    | 17        | 91         | 94         | 95         | 92         | 92         | 94         |
|         |    | 18        | 86         | 89         | 91         | 90         | 90         | 87         |

### Raw Data 2: Individual clinical scores and necropsy observations

[illegible]

Raw Data 3: Individual lung qPCR results

|         | ID | CT         |              |        |        |        |        |          |        |                    | ΔCT        |              |        |        |        |        |          |        | 2 <sup>-ΔCT</sup> |              |       |       |       |       |          |       |
|---------|----|------------|--------------|--------|--------|--------|--------|----------|--------|--------------------|------------|--------------|--------|--------|--------|--------|----------|--------|-------------------|--------------|-------|-------|-------|-------|----------|-------|
|         |    | ORF1<br>ab | IFN $\gamma$ | IL-2   | IL-4   | IL-6   | IL-10  | IL-12p40 | IL-21  | $\beta$ -<br>Actin | ORF1<br>ab | IFN $\gamma$ | IL-2   | IL-4   | IL-6   | IL-10  | IL-12p40 | IL-21  | ORF1<br>ab        | IFN $\gamma$ | IL-2  | IL-4  | IL-6  | IL-10 | IL-12p40 | IL-21 |
| Group A | 1  | 23.467     | 24.942       | 30.431 | 28.228 | 27.148 | 26.253 | 30.617   | 28.786 | 22.562             | 0.905      | 6.218        | 11.707 | 9.504  | 8.424  | 7.529  | 11.893   | 10.062 | 0.534             | 0.013        | 0.000 | 0.001 | 0.003 | 0.005 | 0.000    | 0.001 |
|         | 2  | 22.520     | 24.391       | 29.873 | 26.992 | 26.509 | 25.067 | 29.449   | 27.901 | 22.519             | 0.001      | 5.666        | 11.148 | 8.267  | 7.784  | 6.343  | 10.724   | 9.176  | 0.999             | 0.020        | 0.000 | 0.003 | 0.005 | 0.012 | 0.001    | 0.002 |
|         | 3  | 22.671     | 25.383       | 29.240 | 27.535 | 27.653 | 26.825 | 29.463   | 27.755 | 22.859             | -0.188     | 6.296        | 10.153 | 8.447  | 8.565  | 7.738  | 10.376   | 8.668  | 1.139             | 0.013        | 0.000 | 0.003 | 0.003 | 0.005 | 0.001    | 0.002 |
|         | 4  | 22.561     | 25.297       | 29.109 | 27.557 | 27.407 | 26.622 | 29.994   | 27.844 | 22.625             | -0.064     | 6.598        | 10.410 | 8.858  | 8.708  | 7.923  | 11.295   | 9.145  | 1.045             | 0.010        | 0.001 | 0.002 | 0.002 | 0.004 | 0.000    | 0.002 |
|         | 5  | 21.547     | 24.208       | 29.930 | 27.984 | 25.239 | 24.808 | 29.726   | 27.733 | 21.719             | -0.172     | 6.283        | 12.005 | 10.059 | 7.314  | 6.882  | 11.800   | 9.808  | 1.127             | 0.013        | 0.000 | 0.001 | 0.006 | 0.008 | 0.000    | 0.001 |
|         | 6  | 23.456     | 25.951       | 29.944 | 27.605 | 28.205 | 27.510 | 30.119   | 28.777 | 22.865             | 0.591      | 6.947        | 10.939 | 8.601  | 9.200  | 8.505  | 11.115   | 9.772  | 0.664             | 0.008        | 0.000 | 0.003 | 0.000 | 0.000 | 0.000    | 0.001 |
| Group B | 7  | 21.533     | 23.631       | 30.743 | 28.325 | 26.313 | 24.092 | 29.954   | 27.689 | 21.736             | -0.203     | 5.643        | 12.755 | 10.337 | 8.326  | 6.104  | 11.966   | 9.701  | 1.151             | 0.020        | 0.000 | 0.001 | 0.003 | 0.015 | 0.001    | 0.001 |
|         | 8  | 19.986     | 23.837       | 30.343 | 29.070 | 25.952 | 24.381 | 30.489   | 27.956 | 22.082             | -2.096     | 5.533        | 12.038 | 10.766 | 7.648  | 6.076  | 12.184   | 9.651  | 4.275             | 0.022        | 0.000 | 0.001 | 0.005 | 0.015 | 0.000    | 0.001 |
|         | 9  | 21.116     | 24.468       | 29.884 | 27.398 | 26.306 | 25.166 | 29.806   | 28.004 | 22.418             | -1.303     | 5.895        | 11.311 | 8.822  | 7.732  | 6.593  | 11.233   | 9.431  | 2.467             | 0.017        | 0.000 | 0.002 | 0.005 | 0.010 | 0.001    | 0.001 |
|         | 10 | 21.730     | 25.069       | 31.284 | 27.641 | 27.430 | 25.967 | 30.847   | 28.929 | 23.504             | -1.774     | 5.847        | 12.062 | 8.419  | 8.208  | 6.745  | 11.625   | 9.707  | 3.419             | 0.017        | 0.000 | 0.003 | 0.003 | 0.009 | 0.000    | 0.001 |
|         | 11 | 23.051     | 26.499       | 32.954 | 28.525 | 29.026 | 27.447 | 31.994   | 31.006 | 23.739             | -0.688     | 6.524        | 12.979 | 8.549  | 9.050  | 7.471  | 12.019   | 11.030 | 1.612             | 0.011        | 0.000 | 0.003 | 0.002 | 0.006 | 0.000    | 0.000 |
|         | 12 | 20.061     | 24.349       | 30.445 | 28.650 | 25.899 | 25.058 | 30.889   | 28.653 | 22.151             | -2.090     | 6.092        | 12.188 | 10.394 | 7.642  | 6.801  | 12.633   | 10.396 | 4.257             | 0.015        | 0.000 | 0.001 | 0.005 | 0.009 | 0.001    | 0.001 |
| Group C | 13 | 26.975     | 28.145       | 31.268 | 28.511 | 30.313 | 31.436 | 31.818   | 30.473 | 22.373             | 4.602      | 9.552        | 12.674 | 9.918  | 11.720 | 12.843 | 13.224   | 11.879 | 0.041             | 0.000        | 0.000 | 0.001 | 0.000 | 0.000 | 0.000    | 0.000 |
|         | 14 | 31.575     | 28.515       | 31.945 | 28.558 | 32.118 | 32.906 | 31.983   | 30.880 | 22.572             | 9.003      | 9.601        | 13.030 | 9.643  | 13.203 | 13.991 | 13.068   | 11.965 | 0.002             | 0.000        | 0.000 | 0.001 | 0.000 | 0.000 | 0.000    | 0.000 |
|         | 15 | 28.601     | 27.653       | 31.432 | 27.972 | 31.682 | 31.085 | 31.837   | 30.263 | 22.813             | 5.788      | 8.665        | 12.445 | 8.984  | 12.694 | 12.098 | 12.849   | 11.275 | 0.018             | 0.002        | 0.000 | 0.002 | 0.000 | 0.000 | 0.000    | 0.000 |
|         | 16 | 28.119     | 28.340       | 30.075 | 28.930 | 30.587 | 30.749 | 31.536   | 29.721 | 22.506             | 5.614      | 9.469        | 11.203 | 10.058 | 11.715 | 11.877 | 12.664   | 10.849 | 0.020             | 0.000        | 0.000 | 0.001 | 0.000 | 0.000 | 0.000    | 0.001 |
|         | 17 | 29.700     | 27.825       | 29.927 | 27.731 | 31.583 | 31.813 | 30.480   | 28.678 | 23.364             | 6.336      | 8.480        | 10.582 | 8.386  | 12.238 | 12.468 | 11.135   | 9.333  | 0.012             | 0.003        | 0.001 | 0.003 | 0.000 | 0.000 | 0.000    | 0.002 |
|         | 18 | 29.200     | 28.199       | 30.637 | 28.728 | 31.602 | 32.074 | 30.826   | 30.036 | 22.816             | 6.384      | 9.213        | 11.651 | 9.742  | 12.616 | 13.089 | 11.840   | 11.051 | 0.012             | 0.002        | 0.000 | 0.001 | 0.000 | 0.000 | 0.000    | 0.000 |
|         | 19 | 29.200     | 28.199       | 30.637 | 28.728 | 31.602 | 32.074 | 30.826   | 30.036 | 22.816             | 6.384      | 9.213        | 11.651 | 9.742  | 12.616 | 13.089 | 11.840   | 11.051 | 0.012             | 0.002        | 0.000 | 0.001 | 0.000 | 0.000 | 0.000    | 0.000 |
|         | 20 | 29.200     | 28.199       | 30.637 | 28.728 | 31.602 | 32.074 | 30.826   | 30.036 | 22.816             | 6.384      | 9.213        | 11.651 | 9.742  | 12.616 | 13.089 | 11.840   | 11.051 | 0.012             | 0.002        | 0.000 | 0.001 | 0.000 | 0.000 | 0.000    | 0.000 |

**Raw Data 4: Individual TCID50 results on lung tissue.**

| Group    | #ID | Log10 TCID50/mL | Log10 TCID50/48h/mL/g lung | TCID50 mL/g lung |
|----------|-----|-----------------|----------------------------|------------------|
| <b>A</b> | H01 | 6.49            | 7.49                       | 30682760         |
|          | H02 | 5.29            | 6.29                       | 1968300          |
|          | H03 | 6.49            | 7.49                       | 30682760         |
|          | H04 | 6.73            | 7.73                       | 53144100         |
|          | H05 | 5.53            | 6.53                       | 3409196          |
|          | H06 | 6.01            | 7.01                       | 10227587         |
| <b>B</b> | H07 | 6.73            | 7.73                       | 53144100         |
|          | H08 | 6.49            | 7.49                       | 30682760         |
|          | H09 | 5.77            | 6.77                       | 5904900          |
|          | H10 | 6.49            | 7.49                       | 30682760         |
|          | H11 | 6.01            | 7.01                       | 10227587         |
|          | H12 | 6.25            | 7.25                       | 17714700         |
| <b>C</b> | H13 | 1.72            | 2.72                       | 520              |
|          | H14 | 1.72            | 2.72                       | 520              |
|          | H15 | 1.72            | 2.72                       | 520              |
|          | H16 | 1.72            | 2.72                       | 520              |
|          | H17 | 1.72            | 2.72                       | 520              |
|          | H18 | 1.72            | 2.72                       | 520              |

### Raw Data 5: Individual histopathological scoring of lung tissue.

[illegible]



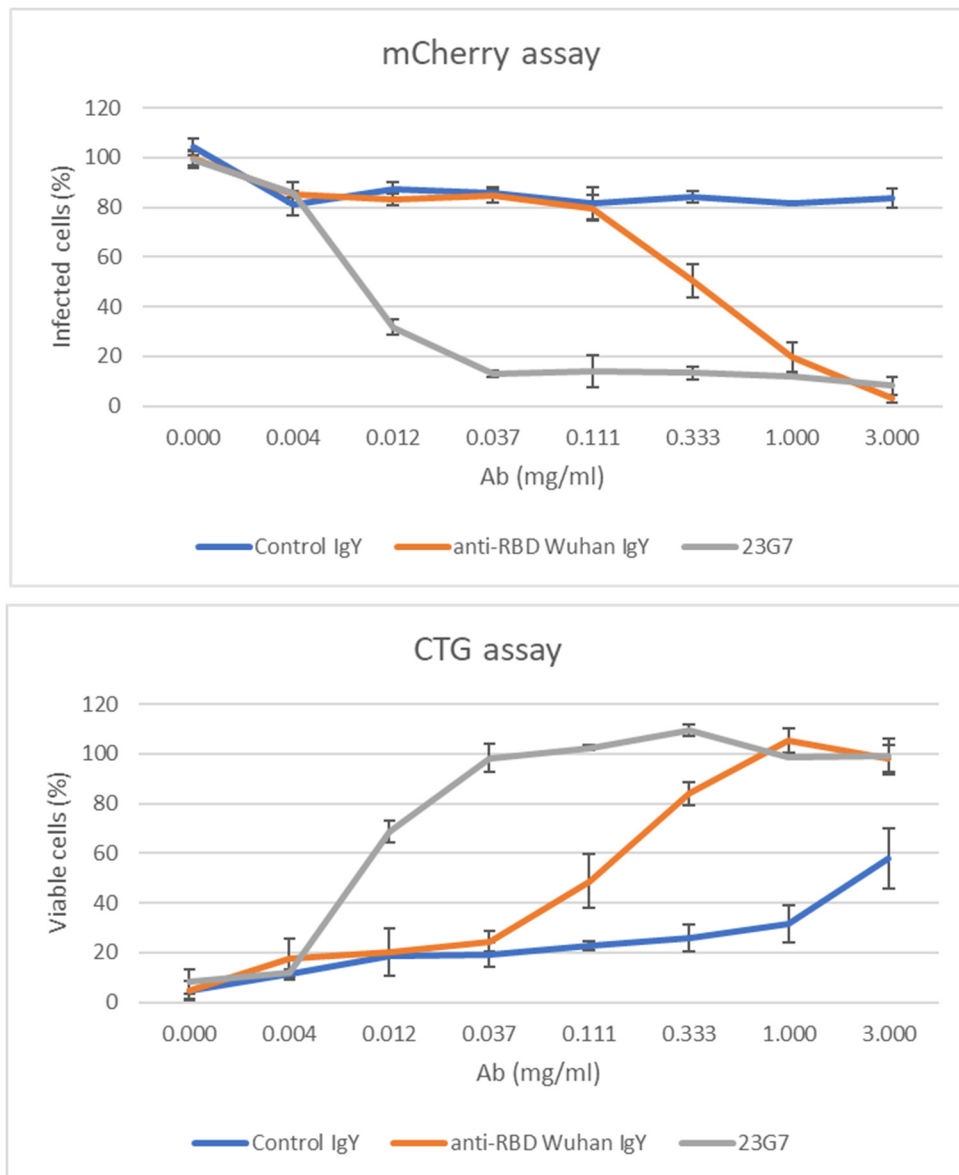

**Figure S1. Comparison of neutralization capacity of** anti-RBD Wuhan antibodies produced in chicken eggs and human monoclonal 23G7 antibody. **(a)** Neutralization capacity of anti-RBD\_Wuhan IgY, 23G7 and control non-immune IgYs was measured by monitoring mCherry fluorescence of Vero-E6 cells after 48 h of infection with mCherry-encoded SARS-CoV-2/Wuhan. Mean; n = 3. **(b)** Neutralization capacity of anti-RBD\_Wuhan, 23G7 and control non-immune IgYs was measured by monitoring viability of Vero-E6 cells after 48 h of infection with mCherry-encoded SARS-CoV-2/Wuhan. Mean; n = 3.
